# Supplementary material
Source: PubMed Central journal article supplement (PMC10438898)
Supplement: NIHMS1867630-supplement-Supplemental_Information.pdf [file NIHMS1867630-supplement-Supplemental_Information.pdf]

## Supporting Information

### **Per- and polyfluoroalkyl substances (PFAS) in facemasks: Potential source of human exposure to PFAS with implications for disposal to landfills**

Derek J. Muensterman<sup>1,‡</sup>, Lilitiana Cahuas<sup>1,‡</sup>, Ivan A. Titaley<sup>2,‡,\*</sup>, Christopher Schmokel<sup>1</sup>, Florentino B. De la Cruz<sup>3</sup>, Morton A. Barlaz<sup>3</sup>, Courtney C. Carignan<sup>4,5</sup>, Graham F. Peaslee<sup>6</sup>, Jennifer A. Field<sup>2</sup>

<sup>1</sup>Department of Chemistry, Oregon State University, Corvallis, Oregon 97331, United States

<sup>2</sup>Department of Environmental and Molecular Toxicology, Oregon State University, Corvallis, Oregon 97331, United States

<sup>3</sup>Department of Civil, Construction, and Environmental Engineering, North Carolina State University, Campus Box 7908, Raleigh, North Carolina 27695-7908, United States

<sup>4</sup>Department of Food Science and Human Nutrition, Michigan State University, East Lansing, Michigan 48824, United States

<sup>5</sup>Department of Pharmacology and Toxicology, Michigan State University, East Lansing, Michigan 48824, United States

<sup>6</sup>Department of Physics, University of Notre Dame, Notre Dame, Indiana 46556, United States

<sup>‡</sup>Co-first authors.

\*Corresponding Author: [ivan.titaley@oregonstate.edu](mailto:ivan.titaley@oregonstate.edu)

Phone: +1 541 737 9208, Fax: +1 541 737 0497

## **Supporting Information contains:**

31 pages, 13 tables, 2 figures, 1 equation

## Content:

|                                                                                                                                      |    |
|--------------------------------------------------------------------------------------------------------------------------------------|----|
| <b>Materials and Methods</b> .....                                                                                                   | 3  |
| <b>Table S1:</b> List of target nonvolatile PFAS analytes.....                                                                       | 9  |
| <b>Table S2:</b> List of target volatile PFAS analytes.....                                                                          | 11 |
| <b>Table S3:</b> List of suspect volatile PFAS analytes.....                                                                         | 12 |
| <b>Table S4:</b> Whole method precision (% RSD), whole method accuracy (% average recovery),<br>LOD, and LOQ (nonvolatile PFAS)..... | 13 |
| <b>Table S5:</b> Nonvolatile PFAS surrogate standards recoveries in matrix blank, blank spike, and<br>samples.....                   | 15 |
| <b>Table S6:</b> Whole method precision (% RSD), whole method accuracy (% average recovery),<br>LOD, and LOQ (volatile PFAS).....    | 16 |
| <b>Table S7:</b> Volatile PFAS surrogate standards recoveries in matrix spike and samples.....                                       | 17 |
| <b>Table S8:</b> Exposure model parameter inputs .....                                                                               | 18 |
| <b>Table S9:</b> Disposal scenario to estimate mass release of PFAS .....                                                            | 21 |
| <b>Equation S1:</b> Estimation of mass PFAS released to landfill leachate or wastewater.....                                         | 21 |
| <b>Table S10:</b> Facemasks by type, material composition, price per unit, total fluorine, and PFAS .....                            | 22 |
| <b>Figure S1:</b> Heat map of nonvolatile and volatile PFAS (ng/g) in facemasks per layer.....                                       | 23 |
| <b>Figure S2:</b> Profiles of detectable PFCAs (C4-C14).....                                                                         | 24 |
| <b>Table S11:</b> Target analyte concentrations ( $\mu\text{g}/\text{m}^2$ ) of individual nonvolatile PFAS .....                    | 26 |
| <b>Table S12:</b> Target analyte concentrations ( $\mu\text{g}/\text{m}^2$ ) of individual volatile PFAS .....                       | 28 |
| <b>Table S13:</b> Suspect nonvolatile PFAS .....                                                                                     | 29 |
| <b>References</b> .....                                                                                                              | 30 |

## Materials and Methods

**Materials.** High performance LC (HPLC) grade water (>99%) and methanol for nonvolatile PFAS analysis (>99%) were purchased from Fisher Scientific (Hampton, NH). Methanol for volatile PFAS analysis ( $\geq 99.5\%$ ) and ammonium acetate for nonvolatile PFAS analysis ( $\geq 97\%$ ) were purchased from VWR (Radnor, PA). Ethylene glycol for nonvolatile PFAS was purchased from Sigma-Aldrich (St. Louis, MO).

**Samples.** Facemasks were purchased from local stores in Notre Dame, IN. Samples were shipped to OSU in re-closable plastic bags. Listed materials composition was based on information provided on the website of the samples. Both SUD and N95 facemasks are made of polypropylene (PP). Cellulose fiber, cotton, polyether (PE)-polyurea (PUR) copolymer; PP; and polyester (PES) make up the inner; middle; and outer layers of RC-1, respectively. The RC-2 sample is made of nylon, PE-PUR copolymer for inner layer, synthetic nylon for middle layer, and micro-PES, PE-PUR copolymer for outer layer. The RC-3 samples is made up of PES and PUR. All of the layers of RC-4 are made of cotton, but the outer layer is treated with ‘*stain resistant addition*’. The three layers of RC-5 are made of cotton and are also treated with ‘*stain resistant addition*’. The RC-6 sample is made of PES and PE-PUR copolymer. No information of material composition was provided for FF, but the middle layer is made of meta-aramid.

**Total Fluorine Analysis by Particle-Induced Gamma Ray Emission.** Facemasks were cut to  $2 \times 2 \text{ cm}^2$  pieces with methanol rinsed scissors and were mounted to a stainless steel target frame with 1 cm diameter. Ion beam analysis was performed *ex vacuo*. In Rodowa *et al.*,<sup>1</sup> an inorganic fluorine calibration curve was used to determine the total fluorine in materials. In this study, total fluorine was determined based on an organic fluorine calibration curve using known amounts of PFOA. The total fluorine in nmol F/cm<sup>2</sup> obtained from the conversion with organic fluorine calibration curve were compared with total fluorine in nmol F/cm<sup>2</sup> obtained based on the

inorganic fluorine calibration curve and density of the materials. The ratio of the total fluorine between the organic and inorganic calibration points ranged from 0.1 to 22× and the linearity of both calibration curves were good ( $R^2 > 0.99$ ). Method accuracy was calculated to be between 96 and 106% and precision was calculated to be  $\pm 5.4\%$ .<sup>2,3</sup> Based on the standard response of the external calibration curve, method limit of detection (LOD) was 6.8 nmol F/cm<sup>2</sup> and method limit of quantitation (LOQ) was 20 nmol F/cm<sup>2</sup>.<sup>4</sup>

***Nonvolatile PFAS Analysis by Liquid Chromatography Quadrupole Time-of-Flight Mass Spectrometry (LC-qTOF).*** Analysis of nonvolatile PFAS was based on the method outlined in Muensterman, *et al.*<sup>5</sup> Methanol-rinsed scissor was used to cut  $2 \times 2$  cm<sup>2</sup> pieces of facemasks in order to allowed free movement of the material within the centrifuge tube. Mass-labeled surrogate standards (0.9 ng) were spiked into all 15 mL centrifuge tubes prior to extraction. Methanol was heated to 60-65°C in a water bath prior to extraction. Aliquot of 3.3 mL of methanol was transferred into a 10 mL graduated cylinder using glass Pasteur pipette before the solution was transferred to the 15 mL centrifuge tubes. The tubes were immediately capped to prevent loss of solvent and each tube was placed on a wrist action shaker at a 10° rotation for 10 min. (Burrell, Model 75, Pittsburgh, PA). Samples were then centrifuged (Thermo Scientific, model Sorvall Legend X1, Waltham, MA) at 2808 g for 10 min. at ambient temperature. The supernatant was transferred to a second centrifuge tube and the extraction was repeated twice more to generate a total volume of 10 mL extracts that were then frozen overnight in a -20°C freezer in order to precipitate any other particulates remaining in the extract. The extracts were taken out of the freezer and centrifuged again at 2808 g for 10 min., after which 30 µL of ethylene glycol was added to each centrifuge tube and concentrated under gentle stream of nitrogen (N-EVAP®, Organomation, Berlin, MA) to a final volume of 150 µL. Aliquot of 50 µL

of each extract was transferred into 150  $\mu$ L conical vials with 0.30 ng of each mass-labelled internal standard spiked to the vials. Extracts were stored at -20°C until analysis.

Chromatographic separations were achieved using an Agilent 1260 HPLC (Santa Clara, CA). Aliquots of 100  $\mu$ L were injected onto a Zorbax Eclipse XDB-C8 (Agilent, 4.6  $\times$  20 mm, 3.5  $\mu$ m) guard column fitted with a Zorbax Eclipse Plus analytical column (Agilent, 4.6  $\times$  75 mm, 3.5  $\mu$ m) as modified after Backe *et al.*<sup>6</sup> The aqueous mobile phase (A) was 10 mM ammonium acetate (Fisher Scientific, Hampton, NH) in 3% v/v HPLC-grade methanol in HPLC-grade water and the organic mobile phase (B) was HPLC-grade methanol.

An AB SCIEX X500R qTOF-MS/MS system (Framingham, MA) was operated in negative mode and in electrospray ionization (ESI-) mode. Data were collected under SWATH<sup>®</sup> data-independent acquisition for both TOF-MS and MS/MS modes. Both PFBA and MPFBA were analyzed in MS/MS mode to reduce background interferences. Over the entirety of the data acquisition period, precursor ion data (TOF-MS) were collected over an  $m/z$  range of 100 Daltons (Da; TOF start mass) to 1250 Da (TOF stop). The accumulation time was 200 ms and the ion spray voltage was -4500 V. The source and gas parameters were: 550 °C source temperature, 60 psi ion source gasses, 35 psi curtain gas, and 10 psi collision gas. The declustering potential was -20 V with 0 V spread and the collision energy was -5 V with 0 V spread. Product ion scan (TOF-MS/MS) data were collected over an  $m/z$  range from 50 Da (TOF start mass) to 1200 Da (TOF stop). The accumulation time for each SWATH<sup>®</sup> window was 50 ms. Identification and quantification of target PFAS was described in Schwichtenberg *et al.*<sup>7</sup>

Method accuracy and precision were determined by spiking four replicate of polypropylene films with 2.25 ng of all target analytes (Table S1) and extracted as outlined above. Polypropylene film was used as representative sample due to the known presence of polymers in facemasks. Whole method accuracy, determined as percent average recovery, and

precision, calculated based on percent relative standard deviation, as well as surrogate standard recoveries were determined for nonvolatile PFAS (Tables S4 and S5).

Whole method LOD and LOQ were determined using the method of Vial and Jardy.<sup>8</sup> Ten  $2 \times 2$  cm<sup>2</sup> polypropylene films were spiked with all nonvolatile target analytes ranging between 0.0045 to 0.45 ng and extracted and analyzed as described above. The LOD was calculated based on linear regression with 1/x weighting and method LOQ was calculated by multiplying LOD by 3.3. Once LOQs were calculated, the concentrations were compared to the lowest calibration check standard that passed the  $\pm 30\%$  of true value criteria. If the calculated LOQs were lower than the lowest passing calibration check standard, then the calibration check standard concentration was used as the LOQ. Both LOD and LOQ are listed in Table S4.

***Nonvolatile PFAS Suspect Screening.*** Data from the LC-qTOF were screened for the presence of suspect nonvolatile PFAS based on the Suspect List of Possible PFAS collated by the National Institutes of Standards and Technology (NIST),<sup>9</sup> which were assumed to be present as the deprotonated molecular ion ( $[M-H]^-$ ) in electrospray ionization (ESI) negative mode (ESI-), to identify suspect matches. Suspect matches were reported only if the area counts were three times higher than all instrument and method blank area counts. Only suspect nonvolatile PFAS with library and NIST list matches were reported. These tentatively identified compounds fell under Level 2b of the Schymanski confidence level.<sup>10</sup>

***Volatile PFAS Analysis by Gas Chromatography-Mass Spectrometry.*** Analysis of volatile target and suspect PFAS was based on the method outlined in Muensterman, *et al.*,<sup>5</sup> with some modifications. Methanol-rinsed scissor was used to cut  $1.5 \times 1.5$  cm<sup>2</sup> pieces of material. Samples were weighed and placed in 2 mL microcentrifuge tubes, mass-labeled surrogate standards and internal standard (150 ng) were spiked, and methanol was added to a final volume of 1500  $\mu$ L. Samples were sonicated for 30 min at 25 °C and then passed through strong anion

exchange (SAX) solid phase extraction (SPE) (Phenomenex, Strata-X-A 33  $\mu\text{m}$ ). An aliquot (1 mL) of sample was added to a methanol-rinsed SAX SPE tube, allowed to elute by gravity flow, and collected. A 1 mL wash consisting of 90% methanol/10% isopropyl alcohol v/v was passed through the SAX SPE tube and collected with previous fraction. Strong anion exchange SPE cleaned extract was transferred to an autosampler vial and stored at  $-15^{\circ}\text{C}$  until analysis.

Sample extracts were analyzed using GC-concurrent solvent recondensation large volume splitless injection coupled with mass spectrometry. Extracts (10  $\mu\text{L}$ ) was injected in splitless mode with an inlet temperature of  $280^{\circ}\text{C}$ . A 4 mm i.d. single taper Topaz inlet liner with 15 mg deactivated quartz wool (Restek, Bellefonte, PA) was used. Helium was used as the carrier gas in a constant flow mode of 1 mL/min. Separations were performed using a deactivated, fused silica tubing capillary column (Agilent, 5 m  $\times$  0.53 mm i.d.) connected to an Rxi-624Sil MS capillary column (Restek, 30 m  $\times$  0.25 mm i.d., 1.40  $\mu\text{m}$  film thickness). The GC oven temperature program was as follows:  $50^{\circ}\text{C}$  for 2 min., ramped to  $188^{\circ}\text{C}$  at a rate of  $5^{\circ}\text{C}/\text{min.}$ , then ramped to  $300^{\circ}\text{C}$  at a rate of  $15^{\circ}\text{C}/\text{min.}$  The Agilent 6890 GC was connected to an Agilent 5973N MS that was operated in positive chemical ionization mode in selected ion monitoring mode with methane as the reagent gas at a flow rate of 1 mL/min.

Method accuracy and precision for volatile PFAS were determined by spiking three polypropylene film replicates to give a final concentration of 50 pg/ $\mu\text{L}$  of FTOHs, FOSAs, and FOSEs target analytes and 5.0 pg/ $\mu\text{L}$  of FTACs and FTMAs target analytes. The LOD for volatile PFAS was determined also according to Vial and Jardy.<sup>8</sup> Ten  $1.5 \times 1.5 \text{ cm}^2$  polypropylene films were spiked with target volatile PFAS ranging between 0.037 to 150 ng of FTOHs, FOSAs, FOSEs and 0.00075 to 15 ng of FTACs and FTMAs, and were extracted and analyzed as described above. The LOD was calculated based on linear regression with 1/x weighting and method LOQ was calculated by multiplying LOD by 3.3. Addition of mass-

labelled surrogate standards could result in the fragmentation in the MS leading to the presence of  $m/z$  ions corresponding to target volatile PFAS<sup>11</sup> and this has been taken into account in the LOQ determination.

**Table S1:** List of target nonvolatile PFAS analytes.<sup>1</sup>

| Analyte                                         | Acronym           | Neutral Molecular Formula                                       | Surrogate Standard        |
|-------------------------------------------------|-------------------|-----------------------------------------------------------------|---------------------------|
| Perfluoro-n-butanoic acid                       | PFBA <sup>2</sup> | C <sub>4</sub> HO <sub>2</sub> F <sub>7</sub>                   | MPFBA                     |
| Perfluoro-n-petnanoic acid                      | PFPeA             | C <sub>5</sub> HO <sub>2</sub> F <sub>9</sub>                   | M3PFPeA                   |
| Perfluoro-n-hexanoic acid                       | PFHxA             | C <sub>6</sub> HO <sub>2</sub> F <sub>11</sub>                  | M2PFHxA                   |
| Perfluoro-n-heptanoic acid                      | PFHpA             | C <sub>7</sub> HO <sub>2</sub> F <sub>13</sub>                  | M4PFHpA                   |
| Perfluoro-n-octanoic acid                       | PFOA              | C <sub>8</sub> HO <sub>2</sub> F <sub>15</sub>                  | M4PFOA                    |
| Perfluoro-n-nonanoic acid                       | PFNA              | C <sub>9</sub> HO <sub>2</sub> F <sub>17</sub>                  | M5PFNA                    |
| Perfluoro-n-decanoic acid                       | PFDA              | C <sub>10</sub> HO <sub>2</sub> F <sub>19</sub>                 | MPFDA                     |
| Perfluoro-n-undecanoic acid                     | PFUdA             | C <sub>11</sub> HO <sub>2</sub> F <sub>21</sub>                 | MPFUdA                    |
| Perfluoro-n-dodecanoic acid                     | PFDoA             | C <sub>12</sub> HO <sub>2</sub> F <sub>23</sub>                 | MPFDoA                    |
| Perfluoro-n-tridecanoic acid                    | PFTTrDA           | C <sub>13</sub> HO <sub>2</sub> F <sub>25</sub>                 | MPFDoA                    |
| Perfluoro-n-tetradecanoic acid                  | PFTeDA            | C <sub>14</sub> HO <sub>2</sub> F <sub>27</sub>                 | M2PFTeDA                  |
| Perfluoro-n-hexadecanoic acid                   | PFHxDA            | C <sub>16</sub> HO <sub>2</sub> F <sub>31</sub>                 | M2PFHxDA                  |
| Perfluoropropane sulfonate                      | PFPrS             | C <sub>3</sub> HO <sub>3</sub> SF <sub>7</sub>                  | M3PFBS                    |
| Perfluorobutane sulfonate                       | PFBS              | C <sub>4</sub> HO <sub>3</sub> SF <sub>9</sub>                  | M3PFBS                    |
| Perfluoropentane sulfonate                      | PFPeS             | C <sub>5</sub> HO <sub>3</sub> SF <sub>11</sub>                 | M3PFBS                    |
| Perfluorohexane sulfonate                       | PFHxS             | C <sub>6</sub> HO <sub>3</sub> SF <sub>13</sub>                 | MPFHxS                    |
| Perfluoroheptane sulfonate                      | PFHpS             | C <sub>7</sub> HO <sub>3</sub> SF <sub>15</sub>                 | MPFHxS                    |
| Perfluorooctane sulfonate                       | PFOS              | C <sub>8</sub> HO <sub>3</sub> SF <sub>17</sub>                 | MPFOS                     |
| Perfluorononane sulfonate                       | PFNS              | C <sub>9</sub> HO <sub>3</sub> SF <sub>19</sub>                 | MPFOS                     |
| Perfluorodecane sulfonate                       | PFDS              | C <sub>10</sub> HO <sub>3</sub> SF <sub>21</sub>                | MPFOS                     |
| Perfluorododecane sulfonate                     | PFDoS             | C <sub>12</sub> HO <sub>3</sub> SF <sub>25</sub>                | MPFOS                     |
| 8-chloro-perfluorooctane sulfonate              | Cl-PFOS           | C <sub>8</sub> HCIF <sub>16</sub> SO <sub>3</sub>               | MPFOS                     |
| Perfluoroethylcyclohexane sulfonate             | PFEtCHxS          | C <sub>8</sub> HO <sub>3</sub> SF <sub>15</sub>                 | MPFHxS                    |
| Perfluorobutane sulfonamide                     | FBSA              | C <sub>4</sub> H <sub>2</sub> O <sub>2</sub> NSF <sub>9</sub>   | M8FOSA                    |
| Perfluorohexane sulfonamide                     | FHxSA             | C <sub>6</sub> H <sub>2</sub> O <sub>2</sub> NSF <sub>13</sub>  | M8FOSA                    |
| Perfluorooctane sulfonamide                     | FOSA              | C <sub>8</sub> H <sub>2</sub> O <sub>2</sub> NSF <sub>17</sub>  | M8FOSA                    |
| N-methylperfluoro-1-octane sulfonamide          | MeFOSA            | C <sub>9</sub> H <sub>4</sub> O <sub>2</sub> NSF <sub>17</sub>  | d-N-MeFOSA-M              |
| N-ethylperfluoro-1-octane sulfonamide           | EtFOSA            | C <sub>10</sub> H <sub>6</sub> O <sub>2</sub> NSF <sub>17</sub> | d-N-EtFOSA-M              |
| Perfluorooctane sulfonamido acetic acid         | FOSAA             | C <sub>10</sub> H <sub>4</sub> O <sub>4</sub> NSF <sub>17</sub> | d <sub>3</sub> -N-MeFOSAA |
| N-methylperfluorooctane sulfonamido acetic acid | MeFOSAA           | C <sub>11</sub> H <sub>6</sub> O <sub>4</sub> NSF <sub>17</sub> | d <sub>3</sub> -N-MeFOSAA |
| N-ethylperfluorooctane sulfonamido acetic acid  | EtFOSAA           | C <sub>12</sub> H <sub>8</sub> O <sub>4</sub> NSF <sub>17</sub> | d <sub>5</sub> -N-EtFOSAA |
| 4:2 fluorotelomer sulfonate                     | 4:2 FTS           | C <sub>6</sub> H <sub>5</sub> O <sub>3</sub> SF <sub>9</sub>    | M2-4:2FTS                 |
| 6:2 fluorotelomer sulfonate                     | 6:2 FTS           | C <sub>8</sub> H <sub>5</sub> O <sub>3</sub> SF <sub>13</sub>   | M2-6:2FTS                 |
| 8:2 fluorotelomer sulfonate                     | 8:2 FTS           | C <sub>10</sub> H <sub>5</sub> O <sub>3</sub> SF <sub>17</sub>  | M2-8:2FTS                 |

| Analyte                                                        | Acronym    | Neutral Molecular Formula                                                                     | Internal Standard |
|----------------------------------------------------------------|------------|-----------------------------------------------------------------------------------------------|-------------------|
| 10:2 fluorotelomer sulfonate                                   | 10:2 FTS   | C <sub>12</sub> H <sub>5</sub> O <sub>3</sub> SF <sub>21</sub>                                | M2-8:2FTS         |
| 6:2 fluorotelomer carboxylic acid                              | 6:2 FTCA   | C <sub>8</sub> H <sub>3</sub> O <sub>2</sub> F <sub>13</sub>                                  | M6:2FTA           |
| 8:2 fluorotelomer carboxylic acid                              | 8:2 FTCA   | C <sub>10</sub> H <sub>3</sub> O <sub>2</sub> F <sub>17</sub>                                 | M8:2FTA           |
| 10:2 fluorotelomer carboxylic acid                             | 10:2 FTCA  | C <sub>12</sub> H <sub>3</sub> O <sub>2</sub> F <sub>21</sub>                                 | M10:2FTA          |
| 3:3 fluorotelomer carboxylic acid                              | 3:3 FTCA   | C <sub>6</sub> H <sub>5</sub> O <sub>2</sub> F <sub>7</sub>                                   | M6:2FTA           |
| 5:3 fluorotelomer carboxylic acid                              | 5:3 FTCA   | C <sub>8</sub> H <sub>5</sub> O <sub>2</sub> F <sub>11</sub>                                  | M8:2FTA           |
| 7:3 fluorotelomer carboxylic acid                              | 7:3 FTCA   | C <sub>10</sub> H <sub>5</sub> O <sub>2</sub> F <sub>15</sub>                                 | M10:2FTA          |
| 2H-Perfluoro-2-octenoic acid (6:2)                             | 6:2 UFTCA  | C <sub>8</sub> H <sub>2</sub> O <sub>2</sub> F <sub>12</sub>                                  | M6:2FTUA          |
| 2H-Perfluoro-2-decenoic acid (8:2)                             | 8:2 UFTCA  | C <sub>10</sub> H <sub>2</sub> O <sub>2</sub> F <sub>16</sub>                                 | M8:2FTUA          |
| Dodecafluoro-3H-4,8-dioxanoate                                 | ADONA      | C <sub>7</sub> H <sub>2</sub> O <sub>4</sub> F <sub>12</sub>                                  | M5PFNA            |
| 9-chlorohexadecafluoro-3-oxanonane-1-sulfonate                 | 9Cl-PF3ONS | C <sub>8</sub> HF <sub>16</sub> ClSO <sub>4</sub>                                             | MPFOS             |
| 11-chloroeicosafluoro-3-oxaundecane-1-sulfonate                | 11-PF3OUdS | C <sub>10</sub> HF <sub>20</sub> ClSO <sub>4</sub>                                            | MPFOS             |
| hexafluoropropylene oxide-dimer acid                           | HFPO-DA    | C <sub>6</sub> HF <sub>11</sub> O <sub>3</sub>                                                | MHFPO-DA          |
| bis(1H,1H,2H,2H-perfluorooctyl)phosphate                       | 6:2 diPAP  | C <sub>16</sub> H <sub>9</sub> F <sub>26</sub> O <sub>4</sub> P                               | M4 8:2 diPAP      |
| bis(1H,1H,2H,2H-perfluorodecyl)phosphate                       | 8:2 diPAP  | C <sub>20</sub> H <sub>9</sub> F <sub>34</sub> O <sub>4</sub> P                               | M4 8:2 diPAP      |
| Bis-[2-(N-ethyleperfluorooctane-1-sulfonamido)ethyl] phosphate | diSAmPAP   | C <sub>24</sub> H <sub>19</sub> F <sub>34</sub> N <sub>2</sub> O <sub>8</sub> PS <sub>2</sub> | M4 8:2 diPAP      |

<sup>1</sup>[M-H]<sup>-</sup> adducts were used for quantification

<sup>2</sup>MRM transitions of 213 → 169 and 217 → 172 were used for quantification of PFBA and MPFBA, respectively, to reduce background.

**Table S2:** List of target volatile PFAS analytes.

| Analyte                                                | Acronym   | Neutral<br>Molecular<br>Formula                                  | Surrogate<br>Standard      |
|--------------------------------------------------------|-----------|------------------------------------------------------------------|----------------------------|
| 4:2 fluorotelomer alcohol                              | 4:2 FTOH  | C <sub>6</sub> H <sub>5</sub> OF <sub>9</sub>                    | MFBET                      |
| 6:2 fluorotelomer alcohol                              | 6:2 FTOH  | C <sub>8</sub> H <sub>5</sub> OF <sub>13</sub>                   | MFHET                      |
| 8:2 fluorotelomer alcohol                              | 8:2 FTOH  | C <sub>10</sub> H <sub>5</sub> OF <sub>17</sub>                  | M2FOET                     |
| 10:2 fluorotelomer alcohol                             | 10:2 FTOH | C <sub>12</sub> H <sub>5</sub> OF <sub>21</sub>                  | MFDET                      |
| 12:2 fluorotelomer alcohol                             | 12:2 FTOH | C <sub>14</sub> H <sub>5</sub> OF <sub>25</sub>                  | MFDET                      |
| <i>N</i> -methyl perfluorooctane sulfonamide           | MeFOSA    | C <sub>9</sub> H <sub>4</sub> NO <sub>2</sub> SF <sub>17</sub>   | d <sub>3</sub> -N-MeFOSA-M |
| <i>N</i> -ethyl perfluorooctane sulfonamide            | EtFOSA    | C <sub>10</sub> H <sub>6</sub> NO <sub>2</sub> SF <sub>17</sub>  | d <sub>5</sub> -N-EtFOSA-M |
| <i>N</i> -methyl perfluorooctane<br>sulfonamidoethanol | MeFOSE    | C <sub>11</sub> H <sub>8</sub> NO <sub>3</sub> SF <sub>17</sub>  | d <sub>7</sub> -N-MeFOSE-M |
| <i>N</i> -ethyl perfluorooctane<br>sulfonamidoethanol  | EtFOSE    | C <sub>12</sub> H <sub>10</sub> NO <sub>3</sub> SF <sub>17</sub> | d <sub>9</sub> -N-EtFOSE-M |
| 4:2 fluorotelomer acrylate                             | 4:2 FTAc  | C <sub>9</sub> H <sub>7</sub> F <sub>9</sub> O <sub>2</sub>      | d <sub>3</sub> -6:2 FTAc   |
| 6:2 fluorotelomer acrylate                             | 6:2 FTAc  | C <sub>11</sub> H <sub>7</sub> F <sub>13</sub> O <sub>2</sub>    | d <sub>3</sub> -6:2 FTAc   |
| 8:2 fluorotelomer acrylate                             | 8:2 FTAc  | C <sub>13</sub> H <sub>7</sub> F <sub>17</sub> O <sub>2</sub>    | d <sub>3</sub> -6:2 FTAc   |
| 10:2 fluorotelomer acrylate                            | 10:2 FTAc | C <sub>15</sub> H <sub>7</sub> F <sub>21</sub> O <sub>2</sub>    | d <sub>3</sub> -6:2 FTAc   |
| 6:2 Fluorotelomer methylacrylate                       | 6:2 FTMAc | C <sub>12</sub> H <sub>9</sub> F <sub>13</sub> O <sub>2</sub>    | d <sub>5</sub> -6:2 FTMAc  |
| 8:2 Fluorotelomer methylacrylate                       | 8:2 FTMAc | C <sub>14</sub> H <sub>9</sub> F <sub>17</sub> O <sub>2</sub>    | d <sub>5</sub> -6:2 FTMAc  |

**Table S3:** List of suspect volatile PFAS analytes.

| Analyte                                      | Acronym   | Neutral Molecular Formula                                        | Surrogate Standard         |
|----------------------------------------------|-----------|------------------------------------------------------------------|----------------------------|
| 14:2 fluorotelomer alcohol                   | 14:2 FTOH | C <sub>16</sub> H <sub>5</sub> OF <sub>29</sub>                  | MFDET                      |
| N-methyl perfluoropropane sulfonamidoethanol | MeFPrSE   | C <sub>6</sub> H <sub>8</sub> NO <sub>3</sub> SF <sub>7</sub>    | d <sub>7</sub> -N-MeFOSE-M |
| N-methyl perfluorobutane sulfonamidoethanol  | MeFBSE    | C <sub>7</sub> H <sub>8</sub> NO <sub>3</sub> SF <sub>9</sub>    | d <sub>7</sub> -N-MeFOSE-M |
| N-methyl perfluoropentane sulfonamidoethanol | MeFPeSE   | C <sub>8</sub> H <sub>8</sub> NO <sub>3</sub> SF <sub>11</sub>   | d <sub>7</sub> -N-MeFOSE-M |
| N-methyl perfluorohexane sulfonamidoethanol  | MeFHxSE   | C <sub>9</sub> H <sub>8</sub> NO <sub>3</sub> SF <sub>13</sub>   | d <sub>7</sub> -N-MeFOSE-M |
| N-methyl perfluoroheptane sulfonamidoethanol | MeFHpSE   | C <sub>10</sub> H <sub>8</sub> NO <sub>3</sub> SF <sub>15</sub>  | d <sub>7</sub> -N-MeFOSE-M |
| N-ethyl perfluoroethane sulfonamidoethanol   | EtFEtSE   | C <sub>6</sub> H <sub>10</sub> NO <sub>3</sub> SF <sub>5</sub>   | d <sub>9</sub> -N-EtFOSE-M |
| N-ethyl perfluoropropane sulfonamidoethanol  | EtFPrSE   | C <sub>7</sub> H <sub>10</sub> NO <sub>3</sub> SF <sub>7</sub>   | d <sub>9</sub> -N-EtFOSE-M |
| N-ethyl perfluorobutane sulfonamidoethanol   | EtFBSE    | C <sub>8</sub> H <sub>10</sub> NO <sub>3</sub> SF <sub>9</sub>   | d <sub>9</sub> -N-EtFOSE-M |
| N-ethyl perfluoropentane sulfonamidoethanol  | EtFPeSE   | C <sub>9</sub> H <sub>10</sub> NO <sub>3</sub> SF <sub>11</sub>  | d <sub>9</sub> -N-EtFOSE-M |
| N-ethyl perfluorohexane sulfonamidoethanol   | EtFHxSE   | C <sub>10</sub> H <sub>10</sub> NO <sub>3</sub> SF <sub>13</sub> | d <sub>9</sub> -N-EtFOSE-M |
| N-ethyl perfluoroheptane sulfonamidoethanol  | EtFHpSE   | C <sub>11</sub> H <sub>10</sub> NO <sub>3</sub> SF <sub>15</sub> | d <sub>9</sub> -N-EtFOSE-M |
| 4:2 fluorotelomer iodide                     | 4:2 FTI   | C <sub>6</sub> H <sub>4</sub> F <sub>9</sub> I                   | d <sub>5</sub> -6:2 FTMAc  |
| 6:2 fluorotelomer iodide                     | 6:2 FTI   | C <sub>8</sub> H <sub>4</sub> F <sub>13</sub> I                  | d <sub>5</sub> -6:2 FTMAc  |
| 8:2 fluorotelomer iodide                     | 8:2 FTI   | C <sub>10</sub> H <sub>4</sub> F <sub>17</sub> I                 | d <sub>5</sub> -6:2 FTMAc  |
| 10:2 fluorotelomer iodide                    | 10:2 FTI  | C <sub>12</sub> H <sub>4</sub> F <sub>21</sub> I                 | d <sub>5</sub> -6:2 FTMAc  |
| Perfluorobutyl iodide                        | PFBI      | C <sub>4</sub> F <sub>9</sub> I                                  | d <sub>5</sub> -6:2 FTMAc  |
| Perfluorohexyl iodide                        | PFHxI     | C <sub>6</sub> F <sub>13</sub> I                                 | d <sub>5</sub> -6:2 FTMAc  |
| Perfluorooctyl iodide                        | PFOI      | C <sub>8</sub> F <sub>17</sub> I                                 | d <sub>5</sub> -6:2 FTMAc  |
| Perfluorodecyl iodide                        | PFDI      | C <sub>10</sub> F <sub>21</sub> I                                | d <sub>5</sub> -6:2 FTMAc  |
| 6:2 fluorotelomer olefin                     | 6:2 FTO   | C <sub>8</sub> H <sub>3</sub> F <sub>13</sub>                    | d <sub>5</sub> -6:2 FTMAc  |
| 8:2 fluorotelomer olefin                     | 8:2 FTO   | C <sub>10</sub> H <sub>3</sub> F <sub>17</sub>                   | d <sub>5</sub> -6:2 FTMAc  |
| 10:2 fluorotelomer olefin                    | 10:2 FTO  | C <sub>12</sub> H <sub>3</sub> F <sub>21</sub>                   | d <sub>5</sub> -6:2 FTMAc  |
| 12:2 fluorotelomer olefin                    | 12:2 FTO  | C <sub>14</sub> H <sub>3</sub> F <sub>25</sub>                   | d <sub>5</sub> -6:2 FTMAc  |

**Table S4:** Whole method precision (% RSD), whole method accuracy (% average recovery), LOD, and LOQ based on polyethylene film (sample matrix) spiked with nonvolatile PFAS. 5000 ng/L nonvolatile PFAS were spiked for whole method precision and whole method accuracy ( $n = 4$ ). 10-1000 ng/L nonvolatile PFAS were spiked for LOD ( $n = 8$ ) and LOQ was calculated by multiplying LOD with 3.3.

| Analyte  | Whole method precision (% RSD) | Whole method accuracy (% average recovery) | LOD ( $\mu\text{g}/\text{m}^2$ ) | LOQ ( $\mu\text{g}/\text{m}^2$ ) |
|----------|--------------------------------|--------------------------------------------|----------------------------------|----------------------------------|
| PFBA     | 6.3                            | 100                                        | 0.5                              | 1.7                              |
| PFPeA    | 6.2                            | 86                                         | 0.77                             | 2.6                              |
| PFHxA    | 6.1                            | 110                                        | 0.61                             | 2                                |
| PFHpA    | 6                              | 95                                         | 0.51                             | 1.7                              |
| PFOA     | 5                              | 93                                         | 0.5                              | 1.7                              |
| PFNA     | 5.5                            | 92                                         | 0.6                              | 2                                |
| PFDA     | 7.8                            | 120                                        | 0.5                              | 1.7                              |
| PFUdA    | 2.5                            | 120                                        | 0.5                              | 1.7                              |
| PFDoA    | 2.7                            | 100                                        | 1                                | 3.4                              |
| PFTTrDA  | 22                             | 86                                         | 0.5                              | 1.7                              |
| PFTeDA   | 3.9                            | 100                                        | 0.5                              | 1.7                              |
| PFHxDA   | 1.2                            | 100                                        | 0.61                             | 2                                |
| PFPrS    | 6.7                            | 85                                         | 0.5                              | 1.7                              |
| PFBS     | 3.2                            | 91                                         | 0.5                              | 1.7                              |
| PFPeS    | 5.5                            | 81                                         | 0.5                              | 1.7                              |
| PFHxS    | 3.2                            | 83                                         | 0.5                              | 1.7                              |
| PFHpS    | 6.1                            | 81                                         | 0.5                              | 1.7                              |
| PFOS     | 6                              | 89                                         | 0.5                              | 1.7                              |
| PFNS     | 7.2                            | 98                                         | 0.5                              | 1.7                              |
| PFDS     | 2.7                            | 94                                         | 0.5                              | 1.7                              |
| PFDoS    | 14                             | 88                                         | 0.5                              | 1.7                              |
| Cl-PFOS  | 7.2                            | 98                                         | 0.5                              | 1.7                              |
| PFEtCHxS | 4.8                            | 81                                         | 0.5                              | 1.7                              |
| FBSA     | 4.5                            | 95                                         | 0.74                             | 2.5                              |
| FHxSA    | 9.7                            | 88                                         | 0.55                             | 1.8                              |
| FOSA     | 7.7                            | 85                                         | 0.52                             | 1.7                              |
| MeFOSA   | 11                             | 100                                        | 0.81                             | 2.7                              |
| EtFOSA   | 4.1                            | 120                                        | 0.75                             | 2.5                              |
| FOSAA    | 6.2                            | 130                                        | 1.2                              | 4.2                              |
| MeFOSAA  | 14                             | 110                                        | 1.1                              | 3.8                              |
| EtFOSAA  | 23                             | 120                                        | 1.2                              | 4.2                              |
| 4:2 FTS  | 10                             | 110                                        | 0.71                             | 2.4                              |
| 6:2 FTS  | 5.1                            | 95                                         | 1                                | 3.4                              |
| 8:2 FTS  | 11                             | 110                                        | 1.2                              | 4.2                              |

|             |     |     |      |     |
|-------------|-----|-----|------|-----|
| 10:2 FTS    | 15  | 310 | 1.2  | 4.2 |
| 3:3 FTCA    | 30  | 96  | 2.2  | 7.3 |
| 5:3 FTCA    | 35  | 96  | 1.7  | 5.6 |
| 7:3 FTCA    | 32  | 120 | 2.5  | 8.2 |
| 6:2 FTCA    | 31  | 160 | 1.4  | 4.6 |
| 8:2 FTCA    | 23  | 82  | 2    | 6.6 |
| 10:2 FTCA   | 61  | 130 | 1.8  | 5.8 |
| 6:2 UFTCA   | 17  | 92  | 1.7  | 5.6 |
| 8:2 UFTCA   | 16  | 130 | 2    | 6.5 |
| ADONA       | 8.4 | 80  | 0.56 | 1.9 |
| 9Cl-PF3ONS  | 9.8 | 96  | 0.5  | 1.7 |
| 11I-PF3OUdS | 4.1 | 91  | 0.5  | 1.7 |
| HFPO-DA     | 23  | 110 | 1.1  | 3.7 |
| 6:2diPAP    | 30  | 41  | 0.77 | 2.6 |
| 8:2diPAP    | 20  | 110 | 1.2  | 4.2 |
| diSAmPAP    | 31  | 61  | 1.2  | 4.2 |

**Table S5:** Nonvolatile PFAS surrogate standards recovery on matrix blank, blank spike, and samples. The recovery of M4PFOA surrogate standard was determined based on the response of M4PFOA relative to the response of M8PFOA as the internal standard. The recovery of MPFOS surrogate standard was determined based on the response of MPFOS relative to the response of M8PFOS as the internal standard. Matrix Blank refers to a sample containing no matrix and no native target analytes. Blank Spike refers to a sample containing no matrix and spiked native target analytes. Data for SUD and RC-6 ( $n = 3$ ) were provided in average $\pm$ standard error.

| Sample Name  | M4PFOA (% recovery) | MPFOS (% recovery) |
|--------------|---------------------|--------------------|
| Matrix Blank | 89                  | 90                 |
| Blank Spike  | 91                  | 98                 |
| SUD          | 71 $\pm$ 2.7        | 71 $\pm$ 1.4       |
| N95          | 83                  | 88                 |
| RC-1-I       | 94                  | 101                |
| RC-1-M       | 76                  | 86                 |
| RC-1-O       | 89                  | 94                 |
| RC-2-I       | 77                  | 82                 |
| RC-2-M       | 85                  | 92                 |
| RC-2-O       | 86                  | 84                 |
| RC-3         | 94                  | 100                |
| RC-4-I       | 11                  | 114                |
| RC-4-M       | 90                  | 96                 |
| RC-4-O       | 103                 | 110                |
| RC-5-I       | 85                  | 85                 |
| RC-5-M       | 77                  | 77                 |
| RC-5-O       | 118                 | 129                |
| RC-6         | 92 $\pm$ 11.8       | 105 $\pm$ 48.0     |
| FF-I         | 84                  | 85                 |
| FF-M         | 118                 | 119                |
| FF-O         | 49                  | 55                 |

**Table S6:** Whole method precision (% RSD), whole method accuracy (% average recovery), LOD, and LOQ based on polypropylene film (sample matrix) spiked with volatile PFAS. 50 pg/ $\mu$ L (FTOHs, Me- and Et-FOSA, and Me- and EtFOSE) and 5 pg/ $\mu$ L (FTAcS and FTMAcS) volatile PFAS were spiked for whole method precision and whole method accuracy ( $n = 3$ ). 0.025-100 pg/ $\mu$ L (FTOHs, Me- and Et-FOSA, and Me- and EtFOSE) and 0.0005-10 pg/ $\mu$ L (FTAcS and FTMAcS) volatile PFAS were spiked for LOD ( $n = 10$ ) and LOQ was calculated by multiplying LOD with 3.3.

| Analyte   | Whole method precision (% RSD) | Whole method accuracy (% average recovery) | LOD ( $\mu$ g/m <sup>2</sup> ) | LOQ ( $\mu$ g/m <sup>2</sup> ) |
|-----------|--------------------------------|--------------------------------------------|--------------------------------|--------------------------------|
| 4:2 FTOH  | 0.62                           | 75                                         | 6.6                            | 22                             |
| 6:2 FTOH  | 0.68                           | 68                                         | 5.4                            | 18                             |
| 8:2 FTOH  | 5.2                            | 62                                         | 14                             | 48                             |
| 10:2 FTOH | 7.0                            | 72                                         | 6.3                            | 21                             |
| 12:2 FTOH | 4.1                            | 67                                         | 12                             | 38                             |
| MeFOSA    | 5.5                            | 90                                         | 11                             | 36                             |
| EtFOSA    | 3.4                            | 100                                        | 12                             | 39                             |
| MeFOSE    | 11                             | 110                                        | 15                             | 51                             |
| EtFOSE    | 11                             | 66                                         | 15                             | 49                             |
| 4:2 FTAc  | 8.4                            | 140                                        | 0.095                          | 0.31                           |
| 6:2 FTAc  | 4.1                            | 100                                        | 0.23                           | 0.75                           |
| 8:2 FTAc  | 12                             | 92                                         | 0.27                           | 0.90                           |
| 10:2 FTAc | 13                             | 95                                         | 0.39                           | 1.3                            |
| 6:2 FTMAc | 6.4                            | 100                                        | 0.27                           | 0.75                           |
| 8:2 FTMAc | 6.6                            | 87                                         | 0.32                           | 1.0                            |

**Table S7:** Volatile PFAS surrogate standards recovery on matrix spike and samples. The recovery of volatile surrogate standard was determined based on the response of each surrogate standard relative to the response of 7:1-FTOH as the internal standard. Matrix Spike refers to a sample containing matrix and spiked mass-labeled and native analytes. Data for Matrix Spike, SUD, RC-6 ( $n = 3$ ) were provided in average $\pm$ standard error.

| Sample Name  | d <sub>4</sub> -4:2 FTOH<br>(% recovery) | <sup>13</sup> C <sub>2</sub> -d <sub>2</sub> -6:2<br>FTOH (%<br>recovery) | <sup>13</sup> C <sub>2</sub> -8:2<br>FTOH (%<br>recovery) | <sup>13</sup> C <sub>2</sub> -d <sub>2</sub> -10:2<br>FTOH (%<br>recovery) | d <sub>3</sub> -N-<br>MeFOSA-M<br>(% recovery) | d <sub>5</sub> -N-<br>EtFOSA-M<br>(% recovery) | d <sub>7</sub> -N-<br>MeFOSE-M<br>(% recovery) | d <sub>9</sub> -N-<br>EtFOSE-M<br>(% recovery) |
|--------------|------------------------------------------|---------------------------------------------------------------------------|-----------------------------------------------------------|----------------------------------------------------------------------------|------------------------------------------------|------------------------------------------------|------------------------------------------------|------------------------------------------------|
| Matrix Spike | 99 $\pm$ 2.9                             | 110 $\pm$ 4.3                                                             | 110 $\pm$ 4.6                                             | 120 $\pm$ 4.6                                                              | 200 $\pm$ 9.2                                  | 200 $\pm$ 8.1                                  | 160 $\pm$ 4.0                                  | 160 $\pm$ 5.3                                  |
| Blank Spike  | 67                                       | 76                                                                        | 72                                                        | 65                                                                         | 29                                             | 28                                             | 38                                             | 57                                             |
| SUD          | 66 $\pm$ 3.3                             | 70 $\pm$ 2.7                                                              | 64 $\pm$ 4.3                                              | 55 $\pm$ 3.8                                                               | 26 $\pm$ 1.7                                   | 26 $\pm$ 2.3                                   | 26 $\pm$ 3.2                                   | 55 $\pm$ 4.4                                   |
| N95          | 62                                       | 65                                                                        | 60                                                        | 60                                                                         | 26                                             | 24                                             | 27                                             | 55                                             |
| RC-1-I       | 65                                       | 68                                                                        | 63                                                        | 63                                                                         | 23                                             | 22                                             | 35                                             | 45                                             |
| RC-1-M       | 77                                       | 74                                                                        | 74                                                        | 72                                                                         | 34                                             | 34                                             | 32                                             | 68                                             |
| RC-1-O       | 72                                       | 71                                                                        | 72                                                        | 70                                                                         | 37                                             | 36                                             | 32                                             | 61                                             |
| RC-2-I       | 64                                       | 72                                                                        | 65                                                        | 62                                                                         | 30                                             | 30                                             | 31                                             | 55                                             |
| RC-2-M       | 78                                       | 85                                                                        | 73                                                        | 75                                                                         | 36                                             | 38                                             | 37                                             | 65                                             |
| RC-2-O       | 68                                       | 78                                                                        | 73                                                        | 79                                                                         | 160                                            | 150                                            | 72                                             | 120                                            |
| RC-3         | 61                                       | 66                                                                        | 64                                                        | 67                                                                         | 140                                            | 150                                            | 54                                             | 110                                            |
| RC-4-I       | 70                                       | 77                                                                        | 73                                                        | 84                                                                         | 150                                            | 150                                            | 94                                             | 120                                            |
| RC-4-M       | 61                                       | 73                                                                        | 74                                                        | 87                                                                         | 190                                            | 180                                            | 78                                             | 150                                            |
| RC-4-O       | 83                                       | 88                                                                        | 84                                                        | 110                                                                        | 210                                            | 200                                            | 100                                            | 210                                            |
| RC-5-I       | 71                                       | 79                                                                        | 77                                                        | 79                                                                         | 180                                            | 170                                            | 65                                             | 130                                            |
| RC-5-M       | 64                                       | 71                                                                        | 68                                                        | 75                                                                         | 170                                            | 160                                            | 59                                             | 120                                            |
| RC-5-O       | 67                                       | 74                                                                        | 70                                                        | 75                                                                         | 180                                            | 170                                            | 89                                             | 130                                            |
| RC-6         | 64 $\pm$ 3.9                             | 73 $\pm$ 3.2                                                              | 72 $\pm$ 4.1                                              | 80 $\pm$ 3.9                                                               | 180 $\pm$ 9.2                                  | 170 $\pm$ 12                                   | 77 $\pm$ 4.8                                   | 135 $\pm$ 12                                   |
| FF-I         | 63                                       | 70                                                                        | 66                                                        | 70                                                                         | 140                                            | 140                                            | 81                                             | 110                                            |
| FF-M         | 65                                       | 74                                                                        | 71                                                        | 71                                                                         | 160                                            | 150                                            | 57                                             | 110                                            |
| FF-O         | 70                                       | 79                                                                        | 74                                                        | 79                                                                         | 170                                            | 160                                            | 64                                             | 130                                            |

**Table S8:** Exposure model parameter inputs. Dermal loading was estimated for each PFAS analyte by applying leachable fractions, then the concentrations were summed into a single total PFAS dermal loading ( $\mu\text{g}/\text{cm}^2$ ) for each mask. For each receptor (child, woman, and man), total PFAS dermal loading was multiplied by 90% of their mask surface area ( $\text{cm}^2$ ) and then divided by body weight (kg) to produce the total amount of PFAS ( $\mu\text{g}/\text{kg}\cdot\text{day}$ ). Absorption across the lungs (inhalation), gastrointestinal tract (ingestion), and skin (dermal) was assumed to be 100% for this preliminary assessment. Risk was calculated as a hazard index by dividing each exposure estimate by a reference dose.

| Parameter                                | Description                                                                                   | Input Value(s)                                |                      |                      | Units               |
|------------------------------------------|-----------------------------------------------------------------------------------------------|-----------------------------------------------|----------------------|----------------------|---------------------|
|                                          |                                                                                               | Child                                         | Adult Female         | Adult Male           |                     |
| PFAS Concentration                       | Sum of the maximum detected concentrations of PFAS analytes.                                  | 0.0046 (SUD), 0.909 (RC-6), and 0.2465 (FF)   |                      |                      | µg/cm <sup>2</sup>  |
| Body Weight                              | Average body weight and normal distribution based on the standard deviation. <sup>12,13</sup> | Mean=13.8<br>SD=1.6                           | Mean=65.0<br>SD=15.2 | Mean=74.8<br>SD=15.9 | kg                  |
| Product Surface Area                     | Measured mask surface area.                                                                   | 170                                           | 230                  | 240                  | cm <sup>2</sup>     |
| Product Thickness                        | Measured mask thickness.                                                                      | 1                                             |                      |                      | mm                  |
| Inhalation: Emission from solid material |                                                                                               |                                               |                      |                      |                     |
| Product Density                          | Measured mass of the mask per cubic centimeter.                                               | 0.085 (SUD), 0.470 (RC-6), and 0.193 (FF)     |                      |                      | g/cm <sup>3</sup>   |
| Diffusion Coefficient                    | Recommended default value. <sup>14</sup>                                                      | 0.00000001                                    |                      |                      | m <sup>2</sup> /sec |
| Weight Fraction Substance                | Total measured amount of PFAS per unit weight of the mask.                                    | 0.0001 (SUD), 0.0002 (RC-6), and 0.00128 (FF) |                      |                      | %                   |

|                                        |                                                                                                                                                                                                                                                 |                                               |                                       |                                       |                      |
|----------------------------------------|-------------------------------------------------------------------------------------------------------------------------------------------------------------------------------------------------------------------------------------------------|-----------------------------------------------|---------------------------------------|---------------------------------------|----------------------|
| Product/Air Partition Coefficient      | Based on the octanol-air partition coefficient ( $K_{oa}$ ) reported by ChemSpider <sup>15</sup> for 6:2 FTOH (anayte measured at the highest concentration in all of the mask samples) using EpiSuite as this value is not available for PFAS. | 4.812                                         |                                       |                                       | $\log_{10}$          |
| Room Volume                            | The volume of air between the mask and face would be approximately 0.0002 m <sup>3</sup> for a mask 1 cm from the face. However, the program requires a minimum value of 0.001 m <sup>3</sup> .                                                 | 0.001                                         |                                       |                                       | m <sup>3</sup>       |
| Ventilation Rate                       | Number of total air exchanges per hour. Assumed the air between the mask and face exchanges fully every 10 breaths. Calculated based on breaths per minute of 30 for children and 20 for adults. <sup>12,13</sup>                               | 180                                           | 120                                   | 120                                   | per hour             |
| Inhalation Rate                        | Volume of air inhaled per unit time. Assumed mean moderate intensity activity level of moderate. Sensitivity analysis used the 95th% for high intensity. <sup>12,13</sup>                                                                       | mean=1.26<br>high=3.18                        | mean= 1.39<br>high=3.80               | mean=1.74<br>high=4.98                | m <sup>3</sup> /hour |
| Mass Transfer Coefficient              | Diffusion rate constant that relates the mass transfer rate, mass transfer area, and concentration change as driving force. Calculated using Langmuir's equation. <sup>14</sup>                                                                 | 1.05                                          |                                       |                                       | meters per hour      |
| Incidental Ingestion: Product Mouthing |                                                                                                                                                                                                                                                 |                                               |                                       |                                       |                      |
| Weight fraction substance              | Measured amount of PFAS per unit mass of the mask.                                                                                                                                                                                              | 0.0001 (SUD), 0.0002 (RC-6), and 0.00128 (FF) |                                       |                                       | %                    |
| Product amount                         | Total mass of the mask.                                                                                                                                                                                                                         | 1.44 (SUD),<br>8.03 (RC-6), 3.28 (FF)         | 1.94 (SUD),<br>10.9 (RC-6), 4.44 (FF) | 2.03 (SUD),<br>11.3 (RC-6), 4.63 (FF) | g                    |

|                                |                                                                                                                                                                                                                                                                                                                                                                                                                    |                                          |     |     |                              |
|--------------------------------|--------------------------------------------------------------------------------------------------------------------------------------------------------------------------------------------------------------------------------------------------------------------------------------------------------------------------------------------------------------------------------------------------------------------|------------------------------------------|-----|-----|------------------------------|
| Exposure duration              | Amount of time mask is worn per unit time. Assumed to be a full day in daycare or at work, plus two hours in shared indoor spaces.                                                                                                                                                                                                                                                                                 | 10                                       |     |     | hours/day                    |
| Contact area                   | Amount of the mask that is mouthed. Estimated assuming that accounts for 1/3 of the mask.                                                                                                                                                                                                                                                                                                                          | 56                                       | 76  | 79  | cm <sup>2</sup>              |
| Initial migration rate         | Amount of PFAS migrating from the mask per unit time. Amount of PFAS that migrates out of the mask per unit amount of material. Based on the maximum value of 90% derived by Wu <i>et al.</i> (2020) for PFAS treated upholstery soaked in synthetic sweat for 2 hours period. <sup>16</sup> This converts to 0.025% per second, which was then multiplied by the mass of PFAS per cm <sup>2</sup> of mask fabric. | 0.0057                                   |     |     | g/cm <sup>2</sup> per second |
| Dermal: Direct Product Contact |                                                                                                                                                                                                                                                                                                                                                                                                                    |                                          |     |     |                              |
| Exposed Area                   | Amount of skin covered by the mask.                                                                                                                                                                                                                                                                                                                                                                                | 170                                      | 230 | 240 | cm <sup>2</sup>              |
| Leachable Fraction             | Fraction of available PFAS that migrates to the skin per unit amount of material. Based on the maximum value derived by Wu <i>et al.</i> (2020) for PFAS treated upholstery soaked in synthetic sweat for 2 hours period. <sup>16</sup>                                                                                                                                                                            | Analyte specific, ranges from 0 to 90%.  |     |     | %                            |
| Dermal Loading                 | Amount of PFAS that contacts the skin per unit amount of material. Calculated for each mask and analyte using analyte specific leachable fractions.                                                                                                                                                                                                                                                                | 0.0032 (SUD), 0.0434 (RC-6), 0.1033 (FF) |     |     | µg/cm <sup>2</sup>           |
| Skin Contact Factor            | Percentage of the mask that touches the face.                                                                                                                                                                                                                                                                                                                                                                      | 90                                       |     |     | %                            |

**Table S9:** Disposal scenario to estimate mass release of PFAS due to pandemic-related surge in use of face covering. Mask area was assumed to be 160 cm<sup>2</sup>.

| Input                                                         | Value                                                                                 | Justification                                                                                              |
|---------------------------------------------------------------|---------------------------------------------------------------------------------------|------------------------------------------------------------------------------------------------------------|
| U.S. Population                                               | 328 million <sup>17</sup>                                                             |                                                                                                            |
| Children who are likely not required to wear masks (<5 years) | 6%                                                                                    | Based on the U.S. Census <sup>17</sup>                                                                     |
| People who do not follow mask rules                           | 40% (Likely Case) <sup>a</sup><br>0% (Extreme Case) <sup>a</sup>                      |                                                                                                            |
| Landfill Disposal Rate for Mask                               | 81%                                                                                   | Estimated from a U.S. EPA Report <sup>18</sup>                                                             |
| Mask use Frequency                                            | 3.6 units/week (Likely Case) <sup>a</sup><br>7 units/week (Extreme Case) <sup>a</sup> | Estimated based on the result on the type and frequency of mask usage survey <sup>19</sup>                 |
| Types of Facemasks                                            |                                                                                       |                                                                                                            |
| SUD                                                           | 48.3%                                                                                 | Adapted from ref. <sup>19</sup>                                                                            |
| N95                                                           | 16.3%                                                                                 |                                                                                                            |
| RC                                                            | 34%                                                                                   |                                                                                                            |
| Other                                                         | 1.5%                                                                                  |                                                                                                            |
| Mass of PFAS in Each Facemask                                 |                                                                                       | Calculated from data in the current study (Tables S8 and S9) assuming facemask area of 165 cm <sup>2</sup> |
| SUD                                                           | 0.75 µg/mask                                                                          |                                                                                                            |
| N95                                                           | 0.25 µg/mask                                                                          |                                                                                                            |
| RC                                                            | 5.3 µg/mask (median value)                                                            |                                                                                                            |
| Other                                                         | 56 µg/mask                                                                            |                                                                                                            |
| % PFAS Leaching                                               | 1% (Likely Case) <sup>a</sup><br>100% (Extreme Case) <sup>a</sup>                     | Amount of PFAS that would potentially be released into the leachate                                        |
| Volume of leachate generated in the US                        | 61.5 million m <sup>3</sup>                                                           | Estimate from Lang <i>et al.</i> <sup>20</sup>                                                             |

<sup>a</sup>Likely Case refers to likely disposal conditions, while Extreme Case refers to upper bound of the leaching potential by varying the input parameters to maximize the PFAS input to landfill.

**Equation S1:** Estimation of mass PFAS released to landfill leachate or wastewater:

$$\begin{aligned}
 &U.S. \text{ Population} \times (1 - \% \text{ of Children not required to wear masks}) \times \\
 &(1 - \% \text{ who do not follow mask rules}) \\
 &\times \text{Mask Use Frequency} \times \text{Landfill disposal rate} \\
 &\quad \times \% \text{ of total masks as SUD or N95} \times \text{Mass of PFAS per mask} \\
 &(\text{for SUD and N95}) \times \text{fraction of PFAS released to leachate} \times \text{Volume of leachate}
 \end{aligned}$$

**Table S10:** Facemasks by type, numbers of layers, material composition, price per unit, total fluorine, and summed concentrations of nonvolatile and volatile PFAS fluorine per-layer. Nonvolatile and volatile PFAS data were provided in the same unit as total fluorine for comparison purposes. Samples SUD and RC-6 were analyzed in triplicates and the data are provided as average±standard error when applicable. The material composition was based on information provided on the website of the facemasks. Only information about the middle layer of the FF mask was available (*e.g.*, meta-aramid).

| Type of facemask <sup>1</sup> | Layers     | Listed material composition                                      | Price per unit <sup>2</sup> | Total Fluorine (nmol F/cm <sup>2</sup> ) <sup>3</sup> | Nonvolatile PFAS (nmol F/cm <sup>2</sup> ) | Volatile PFAS (nmol F/cm <sup>2</sup> ) <sup>4</sup> |
|-------------------------------|------------|------------------------------------------------------------------|-----------------------------|-------------------------------------------------------|--------------------------------------------|------------------------------------------------------|
| SUD                           | One        | Polypropylene (PP)                                               | \$                          | <LOD                                                  | 0.0016±0.00043                             | <LOD                                                 |
| N95                           | One        | PP                                                               | \$                          | <LOD                                                  | 0.00054                                    | <LOD                                                 |
| RC-1                          | inner (I)  | Cellulose fiber, cotton, polyether (PE)-polyurea (PUR) copolymer | \$                          | <LOD                                                  | 0.0027                                     | <LOD                                                 |
|                               | middle (M) | PP                                                               |                             | <LOQ                                                  | 0.00081                                    | <LOD                                                 |
|                               | outer (O)  | Polyester (PES)                                                  |                             | <LOD                                                  | 0.0013                                     | <LOD                                                 |
| RC-2                          | I          | Nylon, PE-PUR copolymer                                          | \$\$\$                      | <LOQ                                                  | 0.00067                                    | <LOD                                                 |
|                               | M          | Synthetic nylon                                                  |                             | <LOD                                                  | 0.00080                                    | <LOD                                                 |
|                               | O          | Micro-PES, PE-PUR copolymer                                      |                             | 7,100                                                 | 0.00351                                    | 0.079                                                |
| RC-3                          | One        | PES, PUR                                                         | \$                          | <LOD                                                  | 0.0055                                     | <LOD                                                 |
| RC-4                          | I          | Cotton                                                           | \$                          | <LOQ                                                  | 0.0041                                     | 0.029                                                |
|                               | M          | Cotton                                                           |                             | <LOQ                                                  | 0.0019                                     | <LOD                                                 |
|                               | O          | Cotton with stain resistant addition                             |                             | 7,600                                                 | 0.0043                                     | 0.82                                                 |
| RC-5                          | I          | Cotton with stain resistant addition                             | \$\$                        | 7,700                                                 | 0.0022                                     | 0.38                                                 |
|                               | M          | Cotton with stain resistant addition                             |                             | 1,500                                                 | 0.0013                                     | 0.39                                                 |
|                               | O          | Cotton with stain resistant addition                             |                             | 8,100                                                 | 0.0028                                     | 0.40                                                 |
| RC-6                          | One        | PES, PE-PUR copolymer                                            | \$\$                        | 40,000±18,000                                         | 0.024±0.0041                               | 0.90±0.057                                           |
| FF                            | I          | Proprietary                                                      | \$\$\$\$                    | 160                                                   | 0.013                                      | 0.17                                                 |
|                               | M          | Meta-aramid                                                      |                             | 23                                                    | 0.00066                                    | 0.094                                                |
|                               | O          | Proprietary                                                      |                             | 460                                                   | 0.028                                      | 4.4                                                  |

<sup>1</sup>SUD = surgical single-use disposable; N95 = N95; RC = reusable cloth facemasks; FF = facemask advertised to firefighters.

<sup>2</sup>Price per unit (US dollars): \$ = <1-14; \$\$ = 14-28; \$\$\$ = 28-42; \$\$\$\$ = 42-56, as of Dec 2021. <sup>3</sup>LOD = limit of detection (6.8 nmol F/cm<sup>2</sup>); LOQ = limit of quantification (20 nmol F/cm<sup>2</sup>). <sup>4</sup>LOD = 0.00027-0.047 nmol F/cm<sup>2</sup>.

**Figure S1:** Heat map of nonvolatile and volatile PFAS (ng/g) in facemasks per layer.<sup>1</sup>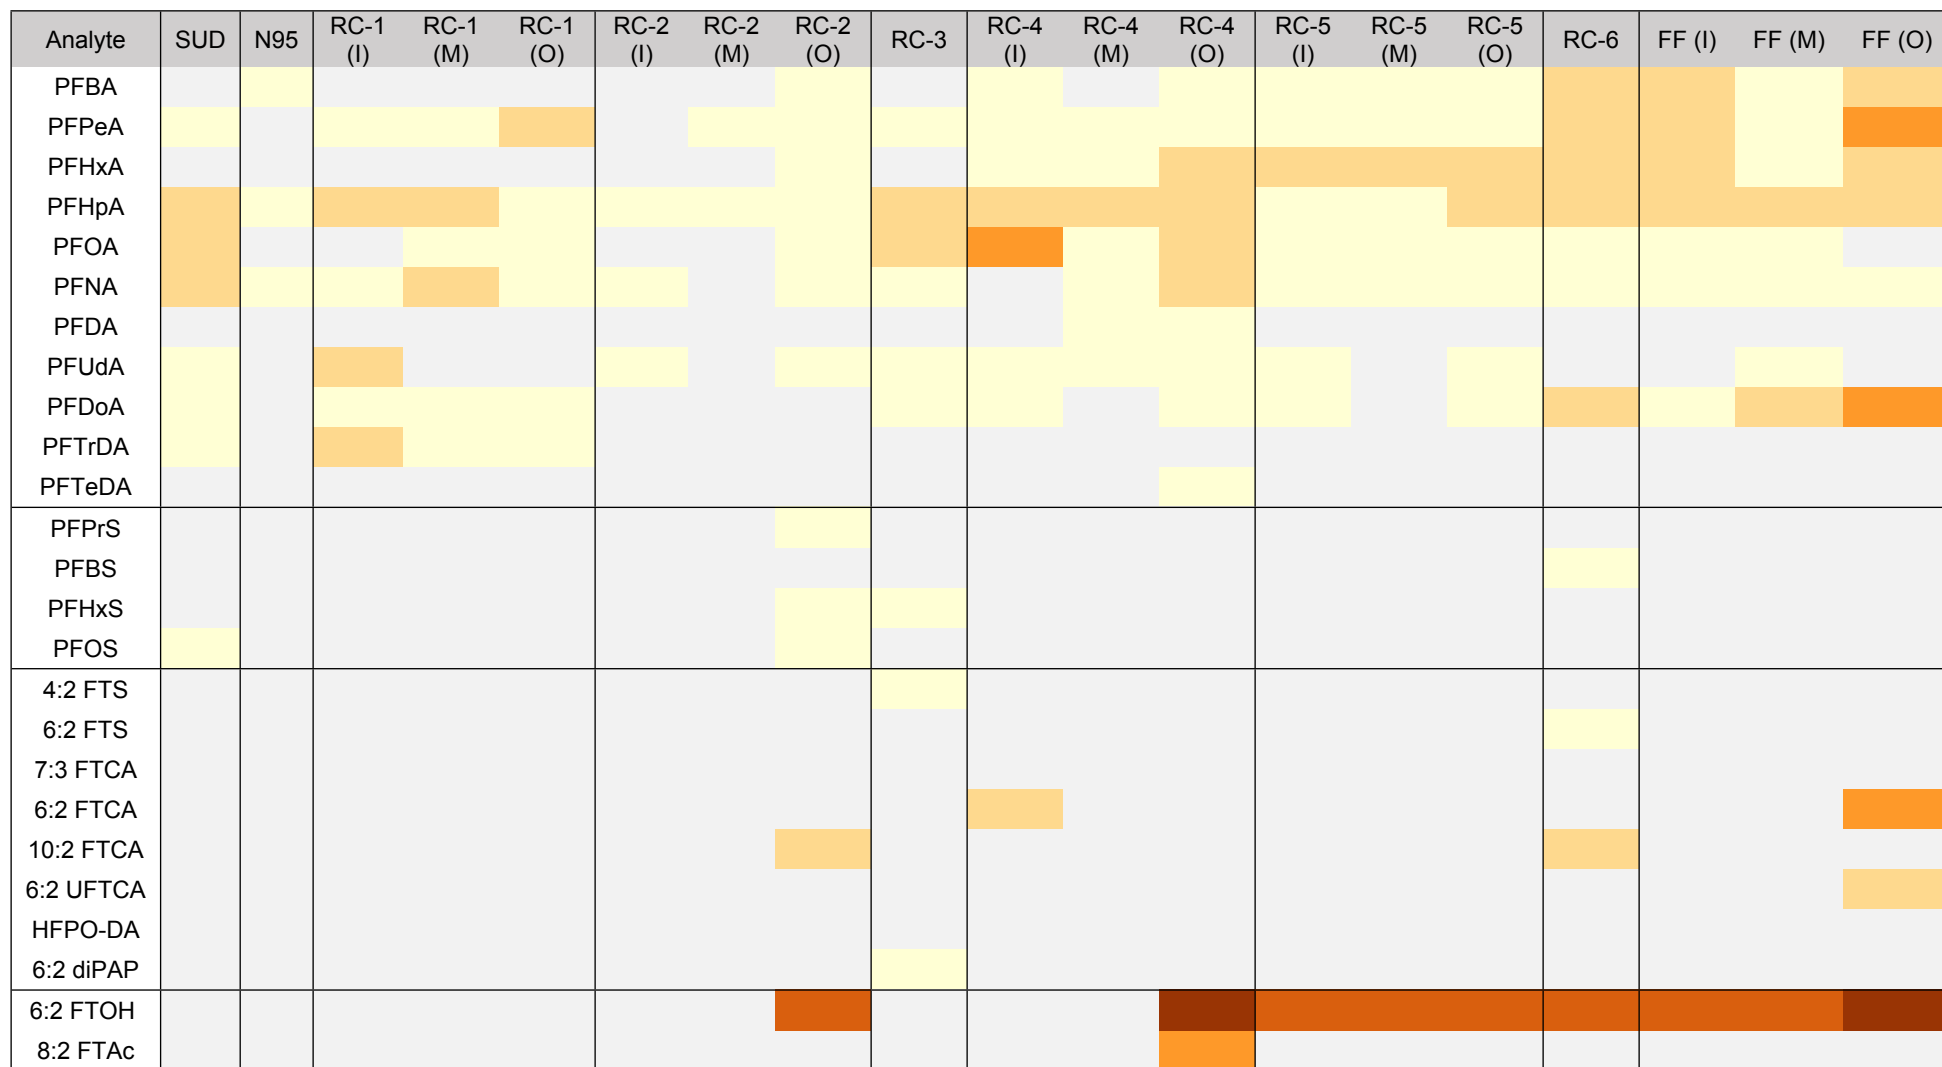<sup>1</sup>Only PFAS with at least one > LOQ concentration included

| Legend          |  |
|-----------------|--|
| <LOQ or <LOD    |  |
| 0.1-1 ng/g      |  |
| 1-10 ng/g       |  |
| 10-100 ng/g     |  |
| 100-1000 ng/g   |  |
| 1000-10000 ng/g |  |

**Figure S2:** Profiles of detectable PFCAs (C4-C14) for a) surgical single-use disposable (SUD); b) N95, c) Reuseable cloth-1 (RC-1), d) RC-2, e) RC-3, f) RC-4, g) RC-5, h) RC-5; and i) specialty facemask advertised to firefighters (FF). RC-1, -2, -4, -5, and FF include an inner, outer and middle layer and error bars represent standard deviation from  $n = 3$  replicates.

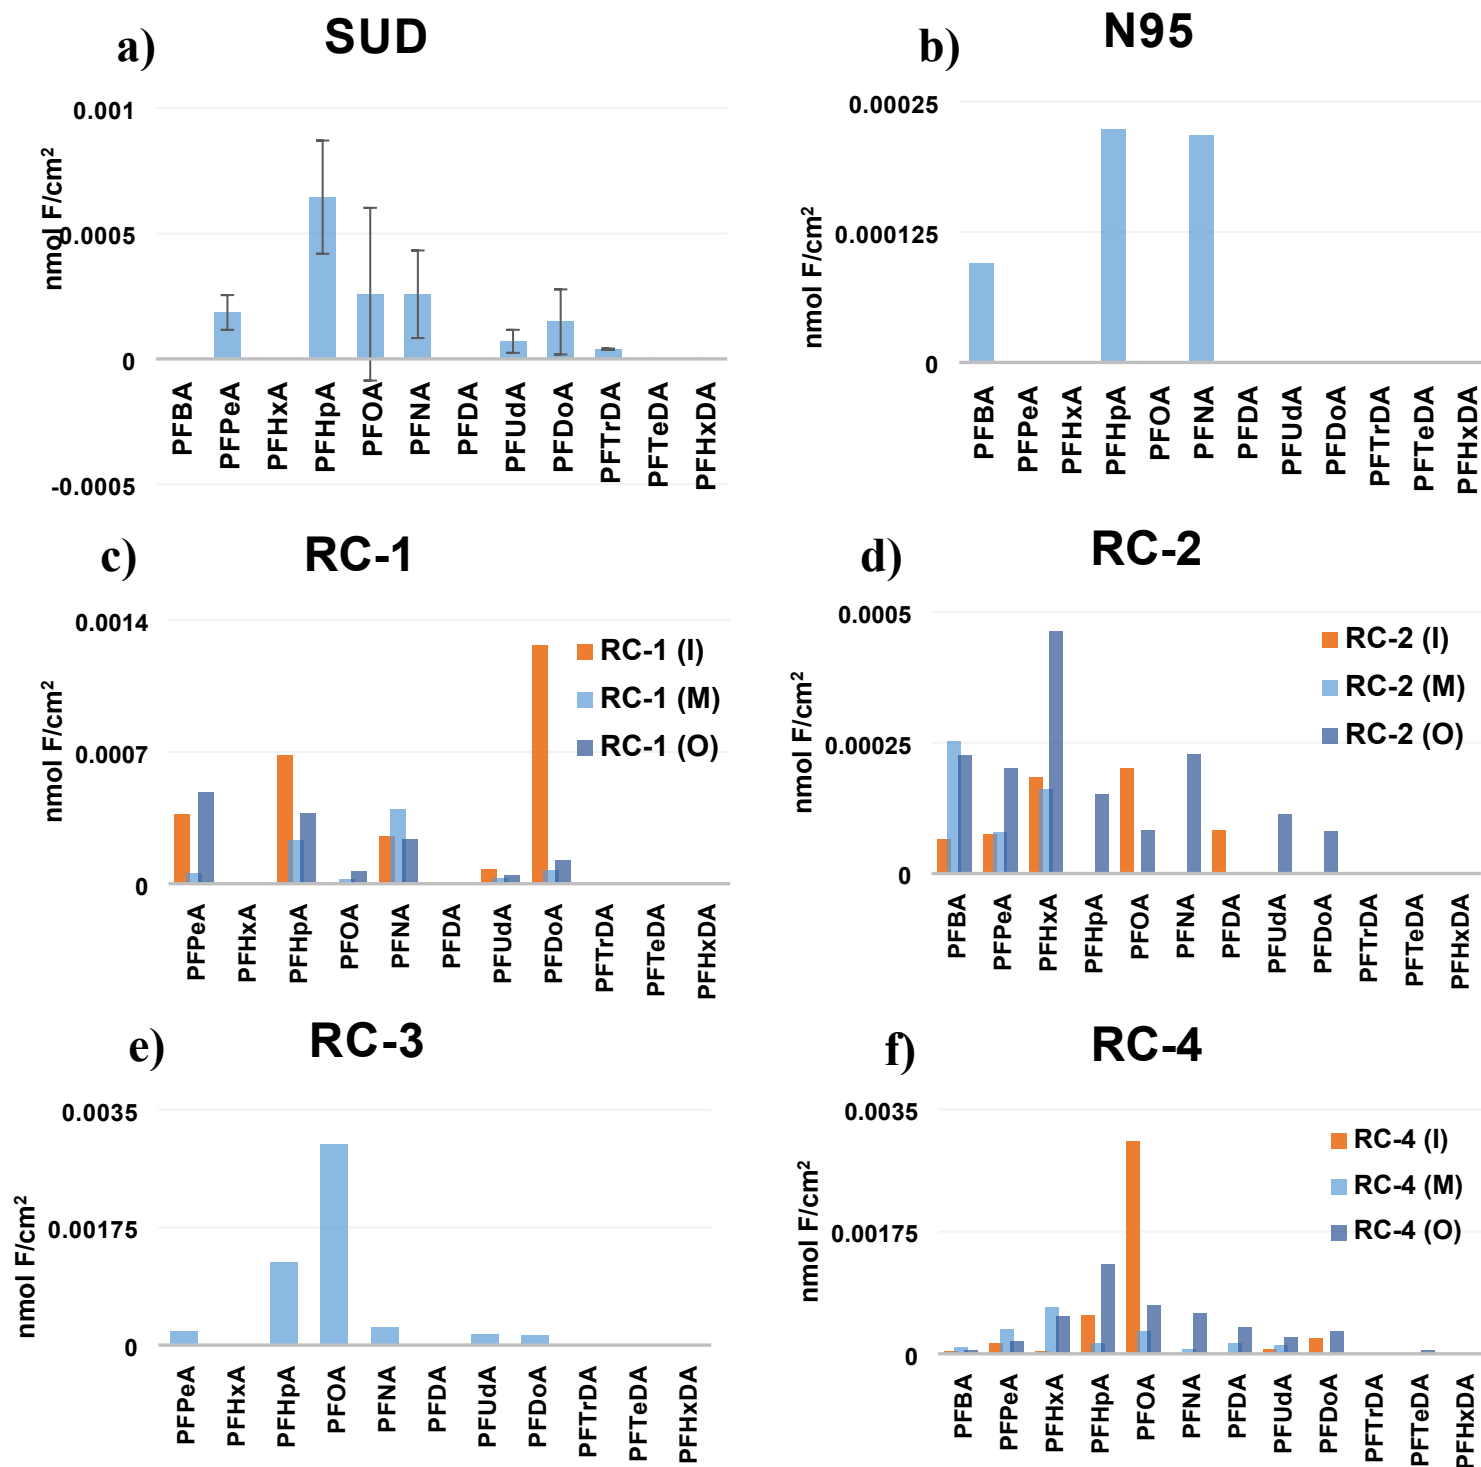

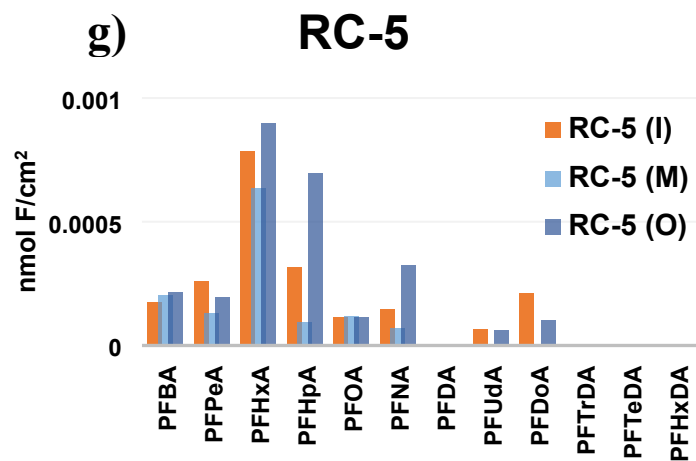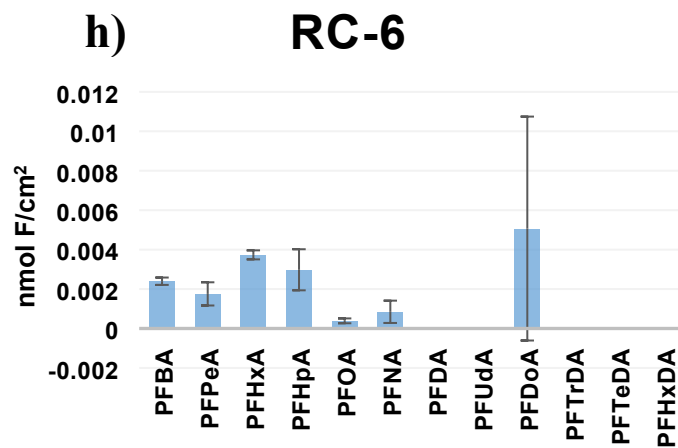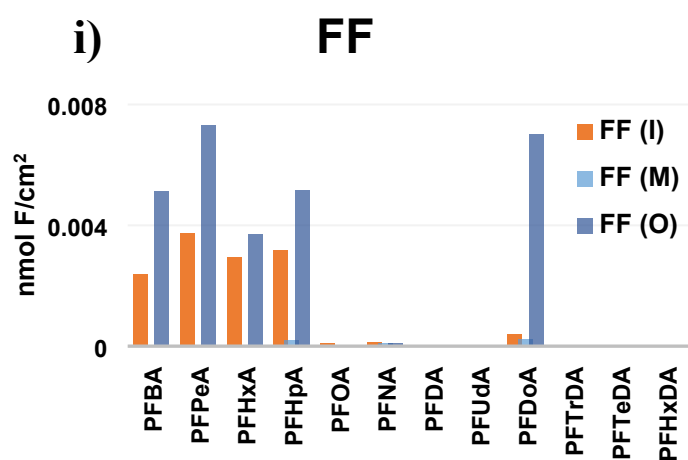



|             |      |      |      |      |      |      |      |      |      |      |      |      |      |      |         |        |      |      |      |     |
|-------------|------|------|------|------|------|------|------|------|------|------|------|------|------|------|---------|--------|------|------|------|-----|
| EtFOSA      | <LOD    | <LOD   | <LOD | <LOD | <LOD | 2.5 |
| FOSAA       | <LOD    | <LOD   | <LOD | <LOD | <LOD | 4.2 |
| MeFOSAA     | <LOD    | <LOD   | <LOD | <LOD | <LOD | 3.8 |
| EtFOSAA     | <LOD    | <LOD   | <LOD | <LOD | <LOD | 4.2 |
| 4:2 FTS     | <LOQ | <LOD | <LOD | <LOD | <LOQ | <LOD | <LOD | <LOD | 9.9  | <LOD | <LOD | <LOD | <LOD | <LOD | <LOD    | <LOD   | <LOD | <LOD | <LOD | 2.4 |
| 6:2 FTS     | <LOQ | <LOD | <LOD | <LOD | <LOD | <LOD | <LOD | <LOQ | <LOD | <LOD | <LOD | <LOQ | <LOQ | <LOQ | 21±0.33 | <LOQ   | <LOD | <LOD | <LOD | 3.4 |
| 8:2 FTS     | <LOD    | <LOD   | <LOD | <LOD | <LOD | 4.2 |
| 10:2 FTS    | <LOD | <LOQ | <LOD | <LOD | <LOD    | <LOD   | <LOD | <LOD | <LOD | 4.2 |
| 3:3 FTCA    | <LOD | <LOD | <LOD | <LOD | <LOD | <LOQ | <LOD    | <LOD   | <LOD | <LOD | <LOD | 7.3 |
| 5:3 FTCA    | <LOD    | <LOD   | <LOD | <LOD | <LOD | 5.6 |
| 7:3 FTCA    | <LOD    | 11     | <LOD | <LOD | <LOD | 8.2 |
| 6:2 FTCA    | <LOD | 11   | <LOD | <LOD | <LOD | <LOD | <LOD    | <LOD   | <LOQ | <LOQ | 390  | 4.6 |
| 8:2 FTCA    | <LOD | <LOD | <LOD | <LOD | <LOD | <LOD | <LOQ | <LOD    | <LOD   | <LOD | <LOD | <LOD | 6.6 |
| 10:2 FTCA   | <LOD | 30   | <LOD | <LOD | <LOD | <LOD | <LOQ | <LOQ | <LOQ    | 110±24 | <LOD | <LOD | <LOD | 5.8 |
| 6:2 UFTCA   | <LOD    | <LOD   | <LOD | <LOD | 59   | 5.6 |
| 8:2 UFTCA   | <LOD | <LOQ | <LOD | <LOD | <LOD | <LOD | <LOD    | <LOD   | <LOD | <LOD | <LOD | 6.5 |
| ADONA       | <LOD    | <LOD   | <LOD | <LOD | <LOD | 1.9 |
| 9CI-PF3ONS  | <LOD    | <LOD   | <LOD | <LOD | <LOD | 1.7 |
| 11I-PF3OUdS | <LOD    | <LOD   | <LOD | <LOD | <LOD | 1.7 |
| HFPO-DA     | <LOD | 2.5  | <LOD    | <LOD   | <LOD | <LOD | <LOD | 3.7 |
| 6:2 diPAP   | <LOQ | <LOD | <LOD | <LOD | <LOQ | <LOQ | <LOD | <LOD | 2.5  | <LOD | <LOD | <LOQ | <LOQ | <LOD | <LOQ    | <LOD   | <LOD | <LOQ | <LOD | 2.6 |
| 8:2 diPAP   | <LOQ | <LOD | <LOQ | <LOD | <LOD | <LOD | <LOD | <LOD | <LOD | <LOQ | <LOD | <LOD | <LOD | <LOD | <LOD    | <LOD   | <LOD | <LOD | <LOQ | 4.2 |
| diSAmPAP    | <LOD    | <LOD   | <LOD | <LOD | <LOD | 4.2 |



**Table S13:** Electrofluorination (ECF)- and fluorotelomer (FT)-based suspect nonvolatile PFAS and their NIST numbers,<sup>9</sup> structures (Level 2b), and reports of occurrence in the literature.

| Suspect           | Facemask | NIST Number | Structure                                                                          | Reported Occurrence in Literature                    |
|-------------------|----------|-------------|------------------------------------------------------------------------------------|------------------------------------------------------|
| 1-OH-8:2 FTS (FT) | RC-4-O   | 3195        | 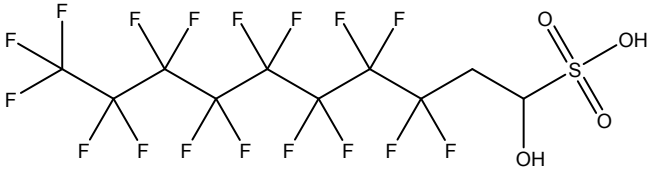 | Barzen-Hanson <i>et al.</i> , 2017 <sup>21</sup>     |
| 8:2 FTOS (FT)     | RC-4-O   | 3517        | 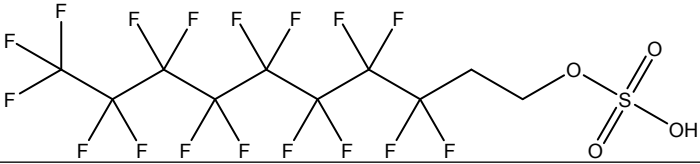 | Inferred by Tseng <i>et al.</i> , 2014 <sup>22</sup> |
| AmPr-FPrSA (ECF)  | RC-6     | 3455        | 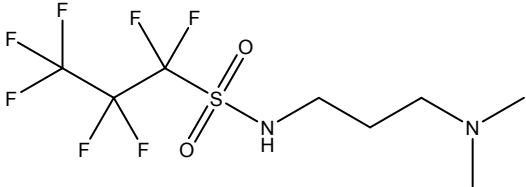 | D'Agostino and Mabury, 2014 <sup>23</sup>            |

## References

- (1) Rodowa, A. E.; Christie, E.; Sedlak, J.; Peaslee, G. F.; Bogdan, D.; DiGuseppi, B.; Field, J. A. Field Sampling Materials Unlikely Source of Contamination for Perfluoroalkyl and Polyfluoroalkyl Substances in Field Samples. *Environ. Sci. Technol. Lett.* **2020**, 7 (3), 156–163. <https://doi.org/10.1021/acs.estlett.0c00036>.
- (2) Peaslee, G. F.; Wilkinson, J. T.; McGuinness, S. R.; Tighe, M.; Caterisano, N.; Lee, S.; Gonzales, A.; Roddy, M.; Mills, S.; Mitchell, K. Another Pathway for Firefighter Exposure to Per- and Polyfluoroalkyl Substances: Firefighter Textiles. *Environ. Sci. Technol. Lett.* **2020**, 7 (8), 594–599. <https://doi.org/10.1021/acs.estlett.0c00410>.
- (3) Ritter, E. E.; Dickinson, M. E.; Harron, J. P.; Lunderberg, D. M.; DeYoung, P. A.; Robel, A. E.; Field, J. A.; Peaslee, G. F. PIGE as a Screening Tool for Per- and Polyfluorinated Substances in Papers and Textiles. *Nucl. Instrum. Methods Phys. Res. Sect. B Beam Interact. Mater. At.* **2017**, 407, 47–54. <https://doi.org/10.1016/j.nimb.2017.05.052>.
- (4) Whitehead, H. D.; Venier, M.; Wu, Y.; Eastman, E.; Urbanik, S.; Diamond, M. L.; Shalin, A.; Schwartz-Narbonne, H.; Bruton, T. A.; Blum, A.; Wang, Z.; Green, M.; Tighe, M.; Wilkinson, J. T.; McGuinness, S.; Peaslee, G. F. Fluorinated Compounds in North American Cosmetics. *Environ. Sci. Technol. Lett.* **2021**, 8 (7), 538–544. <https://doi.org/10.1021/acs.estlett.1c00240>.
- (5) Muensterman, D. J.; Titaley, I. A.; Peaslee, G. F.; Minc, L. D.; Cahuas, L.; Rodowa, A. E.; Horiuchi, Y.; Yamane, S.; Fouquet, T. N. J.; Kissel, J. C.; Carignan, C. C.; Field, J. A. Disposition of Fluorine on New Firefighter Turnout Gear. *Environ. Sci. Technol.* **2022**, 56 (2), 974–983. <https://doi.org/10.1021/acs.est.1c06322>.
- (6) Backe, W. J.; Day, T. C.; Field, J. A. Zwitterionic, Cationic, and Anionic Fluorinated Chemicals in Aqueous Film Forming Foam Formulations and Groundwater from U.S. Military Bases by Nonaqueous Large-Volume Injection HPLC-MS/MS. *Environ. Sci. Technol.* **2013**, 47 (10), 5226–5234. <https://doi.org/10.1021/es3034999>.
- (7) Schwichtenberg, T.; Bogdan, D.; Carignan, C. C.; Reardon, P.; Rewerts, J.; Wanzek, T.; Field, J. A. PFAS and Dissolved Organic Carbon Enrichment in Surface Water Foams on a Northern U.S. Freshwater Lake. *Environ. Sci. Technol.* **2020**, 54 (22), 14455–14464. <https://doi.org/10.1021/acs.est.0c05697>.
- (8) Vial, J.; Jardy, A. Experimental Comparison of the Different Approaches To Estimate LOD and LOQ of an HPLC Method. *Anal. Chem.* **1999**, 71 (14), 2672–2677. <https://doi.org/10.1021/ac981179n>.
- (9) Place, B. Suspect List of Possible Per- and Polyfluoroalkyl Substances (PFAS), 2021, 3 files, 731.6 kB. <https://doi.org/10.18434/MDS2-2387>.
- (10) Schymanski, E. L.; Jeon, J.; Gulde, R.; Fenner, K.; Ruff, M.; Singer, H. P.; Hollender, J. Identifying Small Molecules via High Resolution Mass Spectrometry: Communicating Confidence. *Environ. Sci. Technol.* **2014**, 48 (4), 2097–2098. <https://doi.org/10.1021/es5002105>.
- (11) Cahuas, L.; Titaley, I. A.; Field, J. A. Mass-Labeled Fluorotelomer Alcohol Fragmentation Gives “False Positive” for Nonlabeled Fluorotelomer Alcohols with Implications for Consumer Product Analysis. *J. Am. Soc. Mass Spectrom.* **2022**, 33 (2), 399–403. <https://doi.org/10.1021/jasms.1c00332>.
- (12) US EPA National Center for Environmental Assessment, W. D. Exposure Factors Handbook 2011 Edition (Final Report) <https://cfpub.epa.gov/ncea/risk/recordisplay.cfm?deid=236252> (accessed 2021 -12 -23).

- (13) US EPA National Center for Environmental Assessment, W. D. Child-Specific Exposure Factors Handbook (2008, Final Report)  
<https://cfpub.epa.gov/ncea/risk/recorddisplay.cfm?deid=199243> (accessed 2021 -12 -23).
- (14) Delmaar, J. E.; Schuur, A. G. ConsExpo Web. Consumer Exposure Models - Model Documentation. **2017**. <https://doi.org/10.21945/RIVM-2017-0197>.
- (15) ChemSpider | Search and share chemistry <http://www.chemspider.com/> (accessed 2021 -12 -23).
- (16) Wu, Y.; Miller, G. Z.; Gearhart, J.; Peaslee, G.; Venier, M. Side-Chain Fluorotelomer Based Polymers in Children Car Seats. *Environ. Pollut.* **2020**, 115477.  
<https://doi.org/10.1016/j.envpol.2020.115477>.
- (17) U. S. Census Bureau. U.S. Census Bureau QuickFacts: United States  
<https://www.census.gov/quickfacts/fact/table/US/PST045219> (accessed 2021 -12 -17).
- (18) *Advancing Sustainable Materials Management: 2018 Fact Sheet*; Facts and Figures about Materials, Waste and Recycling; Fact Sheet EPA 530-F-20-009; United States Environmental Protection Agency: Washington, DC, 2020; p 25.
- (19) Selvaranjan, K.; Navaratnam, S.; Rajeev, P.; Ravintherakumaran, N. Environmental Challenges Induced by Extensive Use of Face Masks during COVID-19: A Review and Potential Solutions. *Environ. Chall.* **2021**, 3, 100039.  
<https://doi.org/10.1016/j.envc.2021.100039>.
- (20) Lang, J. R.; Allred, B. M.; Field, J. A.; Levis, J. W.; Barlaz, M. A. National Estimate of Per- and Polyfluoroalkyl Substance (PFAS) Release to U.S. Municipal Landfill Leachate. *Environ. Sci. Technol.* **2017**, 51 (4), 2197–2205. <https://doi.org/10.1021/acs.est.6b05005>.
- (21) Barzen-Hanson, K. A.; Roberts, S. C.; Choyke, S.; Oetjen, K.; McAlees, A.; Riddell, N.; McCrindle, R.; Ferguson, P. L.; Higgins, C. P.; Field, J. A. Discovery of 40 Classes of Per- and Polyfluoroalkyl Substances in Historical Aqueous Film-Forming Foams (AFFFs) and AFFF-Impacted Groundwater. *Environ. Sci. Technol.* **2017**, 51 (4), 2047–2057.  
<https://doi.org/10.1021/acs.est.6b05843>.
- (22) Tseng, N.; Wang, N.; Szostek, B.; Mahendra, S. Biotransformation of 6:2 Fluorotelomer Alcohol (6:2 FTOH) by a Wood-Rotting Fungus. *Environ. Sci. Technol.* **2014**, 48 (7), 4012–4020. <https://doi.org/10.1021/es4057483>.
- (23) D'Agostino, L. A.; Mabury, S. A. Identification of Novel Fluorinated Surfactants in Aqueous Film Forming Foams and Commercial Surfactant Concentrates. *Environ. Sci. Technol.* **2014**, 48 (1), 121–129. <https://doi.org/10.1021/es403729e>.
